# Supplementary material for: Mutagenic Analysis of the Putative ABCC6 Substrate-Binding Cavity Using a New Homology Model
Source: MDPI journal article supplement (doi:10.3390/ijms22136910), 2021-06-27
Supplement: s1 [file s1]

|                 |   |   |   |   |   |   |   |   |   |   |   |   |   |   |   |   |   |   |   |   |   |   |   |   |   |   |   |   |   |   |   |   |   |   |   |   |   |   |   |   |   |   |   |   |   |   |   |   |   |   |   |   |   |   |   |   |   |   |   |   |   |   |   |   |   |   |   |   |   |   |   |   |   |
|-----------------|---|---|---|---|---|---|---|---|---|---|---|---|---|---|---|---|---|---|---|---|---|---|---|---|---|---|---|---|---|---|---|---|---|---|---|---|---|---|---|---|---|---|---|---|---|---|---|---|---|---|---|---|---|---|---|---|---|---|---|---|---|---|---|---|---|---|---|---|---|---|---|---|---|
| ABCC6_Zebrafish | D | P | L | S | A | V | D | A | H | V | G | H | I | F | N | K | V | I | G | P | K | G | I | L | R | D | K | T | R | V | L | V | T | H | G | M | S | F | L | P | Q | A | D | L | I | L | V | L | V | D | G | E | I | S | E | R | G | S | Y | Q | E | L | L | N | R | G | A | F | A | D | F | I |   |
| ABCC5_Mouse     | D | P | L | S | A | L | D | A | H | V | G | N | H | I | F | N | S | A | I | - | - | R | K | R | L | K | S | K | T | V | L | F | V | T | H | L | Q | Y | L | V | D | C | D | E | V | I | F | M | K | E | G | C | I | T | E | R | G | T | H | E | E | L | M | N | L | N | G | D | Y | A | T | I | F |
| ABCC5_Rat       | D | P | L | S | A | L | D | A | H | V | G | N | H | I | F | N | S | A | I | - | - | R | K | R | L | K | S | K | T | V | L | F | V | T | H | L | Q | Y | L | V | D | C | D | E | V | I | F | M | K | E | G | C | I | T | E | R | G | T | H | E | E | L | M | N | L | N | G | D | Y | A | T | I | F |
| ABCC5_Human     | D | P | L | S | A | L | D | A | H | V | G | N | H | I | F | N | S | A | I | - | - | R | K | H | L | K | S | K | T | V | L | F | V | T | H | L | Q | Y | L | V | D | C | D | E | V | I | F | M | K | E | G | C | I | T | E | R | G | T | H | E | E | L | M | N | L | N | G | D | Y | A | T | I | F |
| ABCC5_Zebrafish | D | P | L | S | A | L | D | A | H | V | G | N | H | I | F | N | N | A | I | - | - | K | Q | L | R | G | K | T | V | I | F | V | T | H | L | Q | Y | L | V | D | C | D | D | V | I | V | M | R | D | G | S | I | A | E | Q | G | S | H | E | D | L | M | N | V | N | G | D | Y | A | A | M | F |   |

NBD1
