# Supplementary material for: Mutagenic Analysis of the Putative ABCC6 Substrate-Binding Cavity Using a New Homology Model
Source: MDPI journal article supplement (doi:10.3390/ijms22136910), 2021-06-27
Supplement: s1 [file s1]

**Table S1.**

List of the ABCC1, ABCC5 and ABCC6 sequences and their corresponding UniprotKB codes used to generate the alignment for the homology models.

| Name             | UniProtKB code |
|------------------|----------------|
| ABCC6_Rat        | O88269         |
| ABCC6_Mouse      | Q9R1S7         |
| ABCC6_Human      | O95255         |
| ABCC6_Chimpanzee | A0A2I3SJS2     |
| ABCC6_Gorilla    | G3S3B7         |
| ABCC6_Bovine     | G5E62          |
| ABCC6_Dog        | F1PB44         |
| ABCC6_Rabbit     | G1SYV5         |
| ABCC6_Horse      | F7B7N5         |
| ABCC6_Gpig       | H0V465         |
| ABCC1_Human      | P33527         |
| ABCC1_Macaque    | Q864R9         |
| ABCC1_BosTauros  | Q8HXQ5         |
| ABCC1_Dog        | Q6UR05         |
| ABCC1_Rat        | Q8CG09         |
| ABCC1_Mouse      | O35379         |
| ABCC1_Gallus     | Q5F364         |
| ABCC1_Zebrafish  | A0A0R4IC81     |
| ABCC6_Zebrafish  | E7F118         |
| ABCC5_Mouse      | Q9R1X5         |
| ABCC5_Rat        | Q9QYM0         |
| ABCC5_Human      | O15440         |
| ABCC5_Zebrafish  | E1B2R7         |

**TABLE S2. Functional consequences of mutating rAbcc6 R1168 and R1220 and corresponding residues in hABCC6, hABCC1 and hABCC2**

| ABCC6  |                       |                                             |        |                      |           | hABCC1           |                                                                          |     | hABCC2   |                                                         |     |
|--------|-----------------------|---------------------------------------------|--------|----------------------|-----------|------------------|--------------------------------------------------------------------------|-----|----------|---------------------------------------------------------|-----|
| rAbcc6 | mutation <sup>a</sup> | phenotype                                   | hABCC6 | variant <sup>b</sup> | ref       | mutation         | phenotype                                                                | ref | mutation | phenotype                                               | ref |
| R1168  | R1168A                | ATP efflux reduced $\geq 75\%$ <sup>a</sup> | R1169  | -                    | -         | R1197E<br>R1197K | Organic anion <sup>c</sup> transport reduced $\geq 80\%$                 | [1] | -        | -                                                       | -   |
| R1220  | R1220A                | ATP efflux reduced $\geq 90\%$ <sup>a</sup> | R1221  | R1221C               | [2-4]     | R1249A           | LTC <sub>4</sub> transport reduced 80%; vincristine resistance abolished | [5] | R1257A   | glutathione conjugate transport markedly (>50%) reduced | [6] |
|        |                       |                                             |        | R1221H               | [4, 7, 8] | R1249K<br>R1249D | Organic anion <sup>c</sup> transport reduced $\geq 80\%$                 | [1] |          |                                                         |     |

<sup>a</sup>this paper; <sup>b</sup>pathogenic hABCC6 variant associated with PXE; <sup>c</sup> organic anions tested included estradiol glucuronide, LTC<sub>4</sub>, estrone sulphate, methotrexate

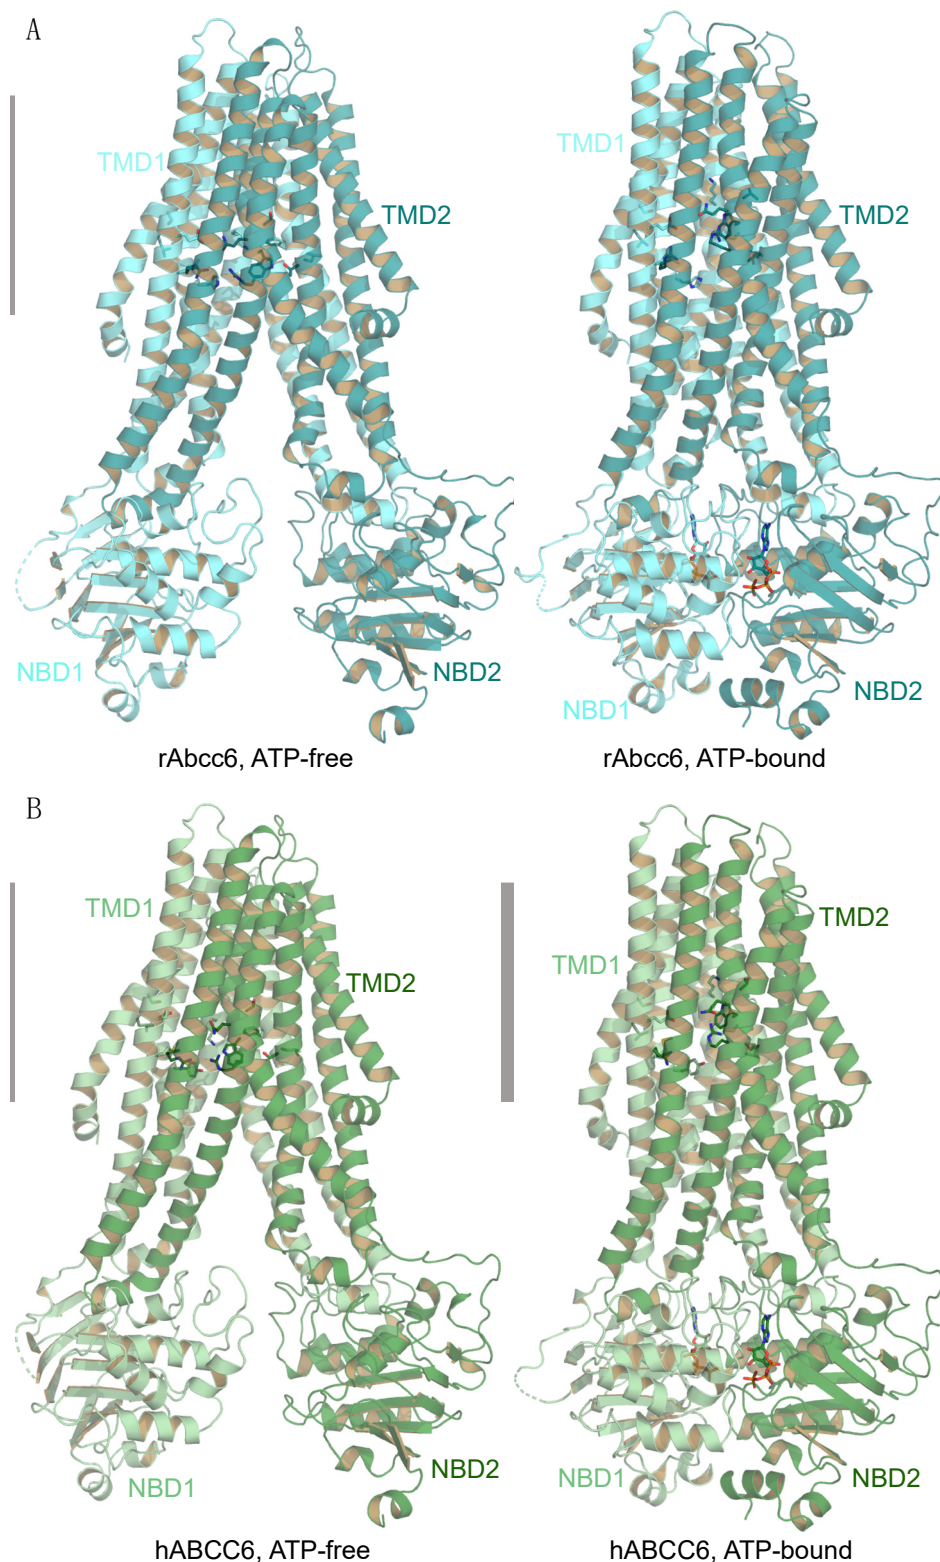

**Figure S1. Structural models of rAbcc6 and hABCC6.** The ABC core of ABCC6 (residues of TMD1-NBD1 and of TMD2-NBD2) is shown for (A) the rAbcc6 and (B) the hABCC6 ATP-free, inward-facing model (left panels) and ATP-bound, outward-facing conformational state of the transport cycle. The residues of the transmembrane cavity that are the subject of this study and described more in detail in the main text are shown as sticks. The ATP molecules bound to the NBDs in the outward-facing states are shown as sticks. TMD1, transmembrane domain 1; TMD2, transmembrane domain 2; NBD1, nucleotide binding domain 1; NBD2, nucleotide binding domain 2. The region of the TMDs embedded in the membrane is highlighted in gray.

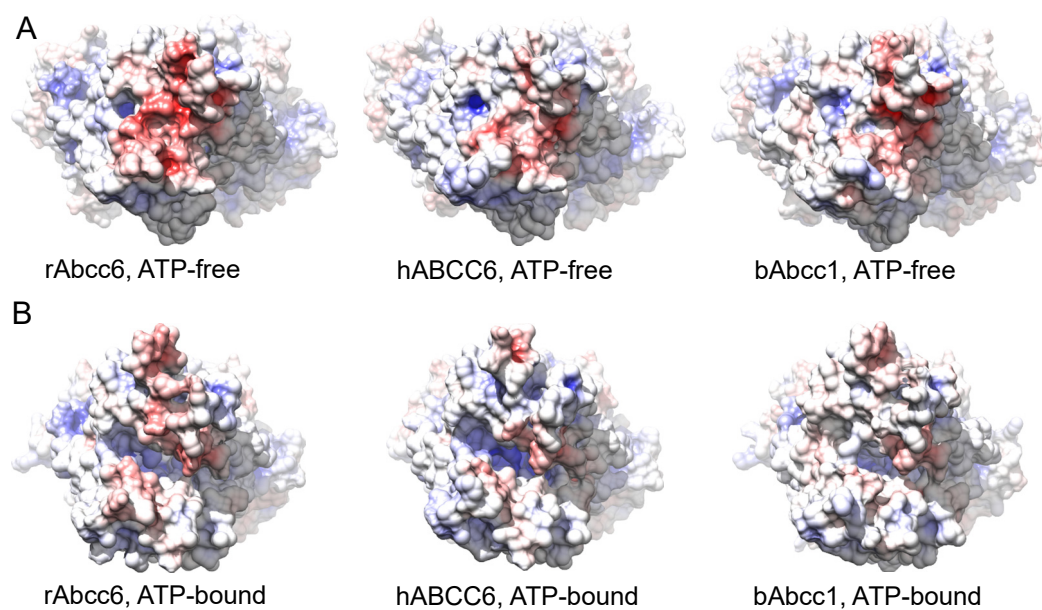

**Figure S2. Electrostatic potential at the extracellular end of the TMDs for rAbcc6 hABCC6 and bAbcc1.** View from the extracellular side of the electrostatic potential mapped on the molecular surface of (A) the ATP-free, inward-facing and (B) the ATP-bound, outward-facing homology models of rAbcc6 and hABCC6 and of the experimental structures of bAbcc1 [9, 10]. The isovalue was set at  $-10 \text{ k}_B\text{T}/e$  for the negative potential (red) and  $+10 \text{ k}_B\text{T}/e$  for the positive potential (blue).

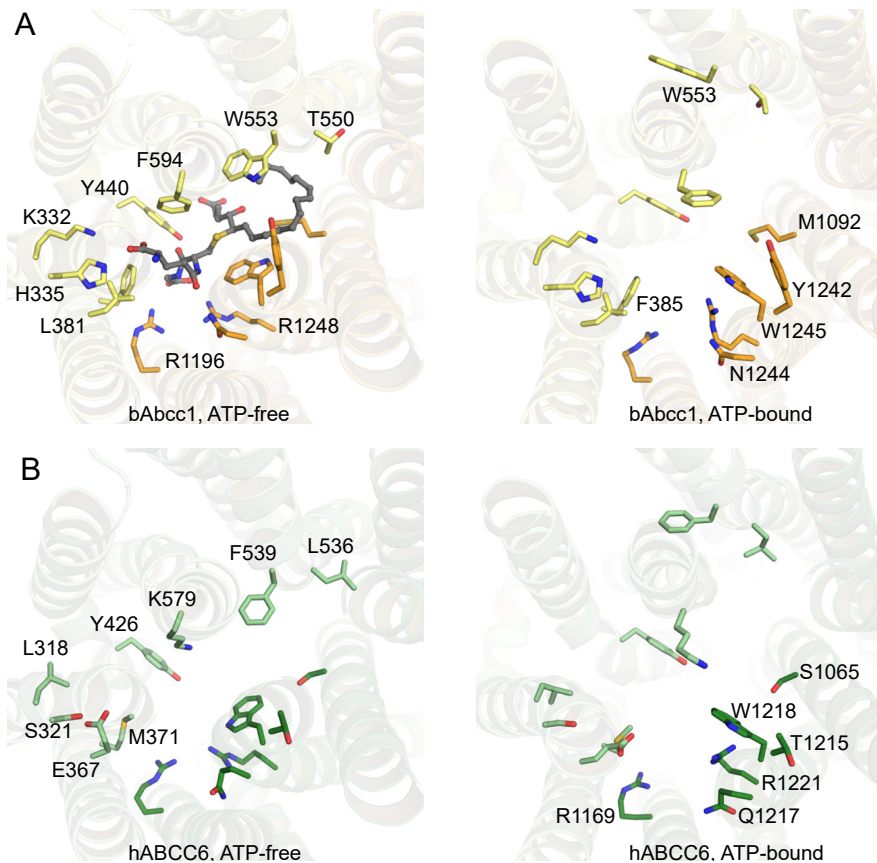

**Figure S3. The LTC<sub>4</sub> binding cavity in bAbcc1 and hABCC6.** A. Residues in the transmembrane cavity of (left) the ATP-free, inward-facing and (right) ATP-bound, outward-facing experimental structures of bAbcc1 [9, 10]. Residues of TMD1 are shown in yellow sticks, and residues of TMD2 are shown in orange. the LTC<sub>4</sub> ligand present in the ATP-free state is shown as gray sticks. B. The corresponding residues in the hABCC6 homology models. Residues of TMD1 are shown in light green sticks, and residues of TMD2 are shown in darker green for the (left) ATP-free, inward-facing and (right) ATP-bound, outward-facing model.



|            |      |                             |                                           |      |
|------------|------|-----------------------------|-------------------------------------------|------|
| MRP1_HUMAN | 292  | DANEVEEALIV-----KSPQKEWNP   | SLFKVLYKTFGPGYFLMSFFFKAIHDLMMFS           | 391  |
| MRP2_HUMAN | 279  | NQSQSQDALVLEDDVEKKKKSGTKKDV | PKSWLMKALFKTFYFVLLKSFLKLKLVNDIFTFV        | 338  |
| MRP3_HUMAN | 279  | NASGE-DEVLL-----GARPRPRKPS  | FLKALLATFGSSFLISACFKLIQDLLSFI             | 327  |
| MRP4_HUMAN | 72   | -----ENDAQKPSLTRA           | IKCYWKSFLVGLGFIETLIESAKVI                 | 108  |
| MRP5_HUMAN | 163  | -----DAASLRVVVMI            | FCFTRLLILSIVCLMITQLAGFS                   | 195  |
| MRP6_HUMAN | 288  | -----FL-----RQEGSQWR        | -PLLKAIWQVFHSTFLLGLTSLIISDVFRFT           | 327  |
|            |      | :                           | :                                         | :    |
| MRP1_HUMAN | 342  | GPQILKL-LIKFVNDTKAPD----    | WQGYFYTVLLFVTAACLQTLVLHQQYFHICFVSGMRIK    | 396  |
| MRP2_HUMAN | 339  | SPQLLKL-LISFASDRDTYL----    | WIGYLCAILLFTAALIQSFCLQCYFQLCFKLGKVVR      | 393  |
| MRP3_HUMAN | 328  | NPQLLSI-LIRFISNPMAPS-----   | WWGFLVAGLMFLFCSMQSLILQHYHYHIFVTGVKFR      | 382  |
| MRP4_HUMAN | 109  | QPIFLGK-IINYENYDPMDSVALNTAY | AYATVLTFTCLLILHLHYFYHVQCAGMRLR            | 167  |
| MRP5_HUMAN | 196  | GPAFMVKHLLLEYTQATESNL----   | QYSLLLVLGLLLTEIVRSWSLALTWALNYRTGVRLR      | 25   |
| MRP6_HUMAN | 328  | VPKLLSL-FLEFIGDPKPPA----    | WKGYLLAVLMLFSLACLQTLFEEQNMYRLKVLQMRLR     | 382  |
|            |      | *                           | :                                         | :    |
| MRP1_HUMAN | 397  | TAVIGAVYRKALVITNSARKSSTVGEI | VNLMVSVDARFMDLATYINMIWSAPLQVILALY         | 456  |
| MRP2_HUMAN | 394  | TAIMASVYKKALTLNSLNARKEYTVGE | TVNLMVSVDADQKLMVDVTFNMHMLWSSSVLQIVLSIF    | 453  |
| MRP3_HUMAN | 383  | TGIMGVIRYKALVITNSVKRASVTGEI | VNLMVSVDARFMDLAPFLNLLWSAPLQIILAIY         | 442  |
| MRP4_HUMAN | 163  | VAMCHMIYRKALRSLNMAMGKTTGGV  | INLLSNDVNKDTQGVTVFLHFWAGPLQAIQAVTA        | 227  |
| MRP5_HUMAN | 252  | GAILTMFAKKILKLKNIK--EKS     | LGELINICSDNGQRMFEAAAVGSSLAGGPVVAAILGMI    | 309  |
| MRP6_HUMAN | 383  | SAITGLVYRKVALSSGSRKASAVGDV  | VNLSVDVQRLTESVLILNGLWLPLVWIVVCFV          | 442  |
|            |      | :                           | :                                         | :    |
| MRP1_HUMAN | 457  | LLWNLNGPSVLAGVAVMLVMPVNAV   | MAMKTKTYQVAHMKSKDNRIKLMNEILNGIKVLK        | 516  |
| MRP2_HUMAN | 454  | FLWRELGPSVLAVGVVMVLVIPINAIL | STKSKTIQVNMKNKDKRLKIMNEILSGIKILK          | 513  |
| MRP3_HUMAN | 443  | FLWQNLGPSVLAVGAVFMVLLIPLNG  | AVAVKMRAFQVKQMKLKDSRIKLMSEILNGIKVLK       | 502  |
| MRP4_HUMAN | 228  | LLWMEIGISCLGMAVLIILLPLQSC   | FGKLFSSLSRKTATFTDARIRTMNEVITGIRI          | 287  |
| MRP5_HUMAN | 310  | YNVILGPPTGLGSAVILFYFPA      | MMFASRLTAYFRKRCVAATDERVQKLMNEVLT          | 369  |
| MRP6_HUMAN | 443  | YLWQLLGPSALTAIAVFISLLPLN    | FFITSKRNHHQEEQMRQKDSARLTSSILRNSKTIK       | 502  |
|            |      | :                           | :                                         | :    |
| MRP1_HUMAN | 517  | LYAWELAFKDKVLAIHQEELKVLK    | KSAYLSAVGTFTVCTPFLVALCTFAVYVITIDENNI      | 576  |
| MRP2_HUMAN | 514  | YFAWEPFRDQVQNLRRKLEKNLLA    | FSQLQCVFVFFQTLPLVLSVVTFSVLVVDSDNNI        | 573  |
| MRP3_HUMAN | 503  | LYAWEPSFLKQVEGIRQGEQLQLLR   | TAAYLHTTTTTFTWMCSPFLVTLITLWVYVYVDPNNV     | 562  |
| MRP4_HUMAN | 288  | MYAWEKSFNLIINLRKKEISKILRS   | SCLRGMNLASFFSASKIIVFVTFTTYVLLG--SV        | 345  |
| MRP5_HUMAN | 370  | MYAWWKAFSQSVQKIREERRILE     | KAGYFQGITVGVAPIVVVIASVVTFSVHMTLG--FD      | 427  |
| MRP6_HUMAN | 503  | FHWEGEAFLDRLVLGIRGQELGAR    | LRTSGLLFSVSLVSEFQVSTFLVALVVFVAVHTLVAE-NA  | 561  |
|            |      | :                           | :                                         | :    |
| MRP1_HUMAN | 577  | LDAQTAFAVSLALFNILRFPLN-IL   | PMVISSIVQASVSLKRLRIFLSHEELEPDSIERRPV      | 635  |
| MRP2_HUMAN | 574  | LDAQKAFTSITLFNILRFPLS-ML    | PMMISSMLQASVSTERLEKYLGDDLDTSAIRHDCN       | 632  |
| MRP3_HUMAN | 563  | LDAEKAFAVSVSLFNILRLPLN-ML   | PQLISNLTQASVSLRKIQQLFSQEELDPQSVERKTI      | 621  |
| MRP4_HUMAN | 346  | ITASRVFVAVTLYGAVRLTVTLFF    | PSPAIERVSEAIIVSIRRTQTFLLLDETSQRNRQ----    | 401  |
| MRP5_HUMAN | 428  | LTAQAQFATVTVTFNSMTFALK-V    | TPFSVKLSLSEASAVDRKFSFLMEVEHMIKN-----      | 481  |
| MRP6_HUMAN | 562  | MNAEKAFTVLTVLNLIINLKAQA-    | FLPFSIHSLVQARVSDRLVTLFLEEVDGPDGVSSSS      | 620  |
|            |      | :                           | :                                         | :    |
| MRP1_HUMAN | 1070 | GNLVNRFSEKELDTVDSMIPEVIK    | FMGSLFNIVIGACIVILLATPIAAIIIPPLGLIYFFV     | 1129 |
| MRP2_HUMAN | 1078 | GRIVNRFAGDISTVDDTLQPSLR     | SWITCFGLGIISTLVMICAMPTVETIIVIPGLIIYVS     | 1137 |
| MRP3_HUMAN | 1066 | GRILNCFSKDIYVDEVLAIPVIL     | MLNSFFNAISTLVIMASTPLTFTVVLPLAVLYTLV       | 1125 |
| MRP4_HUMAN | 819  | GRILNRFSDKIGHLDDLLPLTFL     | DFIQTLTLLQVVGVSVAVAVIPWIAIPLVPLGIIFIFL    | 878  |
| MRP5_HUMAN | 969  | GRILNRFSDKMDDEVDRLFPQ       | AEFMFIQNVILVFFFCVGMIAGVFPWFLVAVGVLPLIFL   | 1028 |
| MRP6_HUMAN | 1042 | GHLNRFSEKETDTVDVDPDKLR      | SLLMYAFGLLEVLVAVATPLATVAIPLVLIFYAGF       | 1101 |
|            |      | :                           | :                                         | :    |
| MRP1_HUMAN | 1130 | QRFYVASSRQLKRLESVSRSPY      | SHFNETLLGVSVIRAFEEQERFIHQSDLKVDENQKAY     | 1189 |
| MRP2_HUMAN | 1138 | QMFYVSTSRQLRRLDSVTRSPI      | YSHFSETVSGLPVIRAFEHQQRFLKHNEVIDRTNQKCV    | 1197 |
| MRP3_HUMAN | 1126 | RRFYAATSRQLKRLESVSRSPY      | SHFSETVTGASVIRAYNRSDRDEIISDTKVDANQRSC     | 1185 |
| MRP4_HUMAN | 879  | RRYFLETSLRQVDRKLESTRSP      | VSFLSHSSSLQGLWTRIRAYKAEERCQELFPAHQDLHSEAW | 938  |
| MRP5_HUMAN | 1029 | HIVSRVLIQELKRLDNIITQSP      | FLSHITSSIQGLATHAYNKGQEFHLHRYQELLDNDQAPF   | 1088 |
| MRP6_HUMAN | 1102 | QSLYVVSQCRLRLESASYSVC       | SHMAETFCQSTTVVRAFRTQAPFVAQNNAVVDQSQRIS    | 1161 |
|            |      | :                           | :                                         | :    |
| MRP1_HUMAN | 1190 | YPSIVANRWLAVRLECVGNCIV      | LFAALFAVISRHSLSAGLVGLSVSYSLQVTTYLNWLVR    | 1249 |
| MRP2_HUMAN | 1198 | FSWITSNRWLAIRLELVGNLT       | VFFSALMMVIYRDTLSGDTVGFVLSNALNITQTLNWLVR   | 1257 |
| MRP3_HUMAN | 1186 | YPYIISNRWLSIGVEFVGCN        | CVLFAALFAVIGRSSLNPLVGLSVSYSLQVTFALNMWIR   | 1245 |
| MRP4_HUMAN | 939  | FLFLTTSRWFAVRDLDAICAM       | FVIIIVAFGSLDILAKTLDAGQGLALSYALTLMGMFQWCVR | 99   |

## References

1. Situ, D.; Haimeur, A.; Conseil, G.; Sparks, K. E.; Zhang, D.; Deeley, R. G.; Cole, S. P., Mutational analysis of ionizable residues proximal to the cytoplasmic interface of membrane spanning domain 3 of the

multidrug resistance protein, MRP1 (ABCC1): glutamate 1204 is important for both the expression and catalytic activity of the transporter. *J Biol Chem* **2004**, 279 (37), 38871-80.

2. Noji, Y.; Inazu, A.; Higashikata, T.; Nohara, A.; Kawashiri, M.; Yu, W.; Todo, Y.; Nozue, T.; Uno, Y.; Hifumi, S.; Mabuchi, H., Identification of two novel missense mutations (p.R1221C and p.R1357W) in the ABCC6 (MRP6) gene in a Japanese patient with pseudoxanthoma elasticum (PXE). *Internal medicine (Tokyo, Japan)* **2004**, 43 (12).
3. Miksch, S.; Lumsden, A.; Guenther, U.; Foernzler, D.; Christen-Zäch, S.; Daugherty, C.; Ramesar, R.; Lebwohl, M.; Hohl, D.; Neldner, K.; Lindpaintner, K.; Richards, R.; Struk, B., Molecular genetics of pseudoxanthoma elasticum: type and frequency of mutations in ABCC6. *Human mutation* **2005**, 26 (3).
4. Pfendner, E.; Vanakker, O. M.; Terry, S.; Vourthis, S.; McAndrew, P. E.; McClain, M. R.; Fratta, S.; Marais, A. S.; Hariri, S.; Coucke, P. J.; Ramsay, M.; Viljoen, D.; Terry, P. F.; De Paepe, A.; Uitto, J.; Bercovitch, L. G., Mutation Detection in the ABCC6 Gene and Genotype-Phenotype Analysis in a Large International Case Series Affected by Pseudoxanthoma Elasticum. *Journal of medical genetics* **2007**, 44 (10).
5. Ren, X.; Furukawa, T.; Aoki, S.; Sumizawa, T.; Haraguchi, M.; Nakajima, Y.; Ikeda, R.; Kobayashi, M.; Akiyama, S., A positively charged amino acid proximal to the C-terminus of TM17 of MRP1 is indispensable for GSH-dependent binding of substrates and for transport of LTC4. *Biochemistry* **2002**, 41 (48).
6. Ryu, S.; Kawabe, T.; Nada, S.; Yamaguchi, A., Identification of basic residues involved in drug export function of human multidrug resistance-associated protein 2. *The Journal of biological chemistry* **2000**, 275 (50).
7. Verschuere, S.; Navassiolava, N.; Martin, L.; Nevalainen, P.; Coucke, P.; Vanakker, O., Reassessment of causality of ABCC6 missense variants associated with pseudoxanthoma elasticum based on Sherloc. *Genetics in medicine : official journal of the American College of Medical Genetics* **2020**.
8. Nitschke, Y.; Baujat, G.; Botschen, U.; Wittkamp, T.; du Moulin, M.; Stella, J.; Le Merrer, M.; Guest, G.; Lambot, K.; Tazarourte-Pinturier, M. F.; Chassaing, N.; Roche, O.; Feenstra, I.; Loechner, K.; Deshpande, C.; Garber, S. J.; Chikarmane, R.; Steinmann, B.; Shahinyan, T.; Martorell, L.; Davies, J.; Smith, W. E.; Kahler, S. G.; McCulloch, M.; Wraige, E.; Loidi, L.; Höhne, W.; Martin, L.; Hadj-Rabia, S.; Terkeltaub, R.; Rutsch, F., Generalized Arterial Calcification of Infancy and Pseudoxanthoma Elasticum Can Be Caused by Mutations in Either ENPP1 or ABCC6. *American journal of human genetics* **2012**, 90 (1).
9. Johnson, Z. L.; Chen, J., Structural Basis of Substrate Recognition by the Multidrug Resistance Protein MRP1. *Cell* **2017**, 168 (6), 1075-1085 e9.
10. Johnson, Z. L.; Chen, J., ATP Binding Enables Substrate Release from Multidrug Resistance Protein 1. *Cell* **2018**, 172 (1-2), 81-89 e10.
